# Supplementary material for: Effect of glutamic acid foliar applications on lettuce under water stress
Source: PubMed Central journal article supplement (PMC8140180; doi:10.1007/s12298-021-00984-6), 2021-04-22
Supplement: 12298_2021_984_MOESM1_ESM.pdf [file 12298_2021_984_MOESM1_ESM.pdf]

## Supplementary material

**Table S1.** Primers sequences and melting temperature (Tm) for qRT-PCR analysis

| GENE         | PRIMER PAIR    | SEQUENCE (5'→3')       | Tm (°C) |
|--------------|----------------|------------------------|---------|
| <i>APX</i>   | Forward primer | ACTCATCCGGAAAGAGAGAGC  | 63.7    |
|              | Reverse primer | CTGAAGAGGCTTATCCGGGC   | 67.0    |
| <i>MDHAR</i> | Forward primer | GCTTCTGTTGAGGAAGCCCT   | 64.7    |
|              | Reverse primer | GCACATCCTGACCTCTCTCG   | 65.1    |
| <i>GR</i>    | Forward primer | GCAATAGAGTGGAGTCAGGTGG | 64.8    |
|              | Reverse primer | AACGTCTCCAAGTCCCAAA    | 66.7    |
| <i>SOD</i>   | Forward primer | ATCCATGCAACCAGGAGGTG   | 67.2    |
|              | Reverse primer | AAAACAAGCCAAACCCAGCC   | 67.1    |
| <i>CAT</i>   | Forward primer | AGCTTCCTGCAAATGCTCCT   | 65.2    |
|              | Reverse primer | GAGCAGGGTCGTGTCTTGAA   | 65.5    |
| <i>DHAR</i>  | Forward primer | CTGGATGGGCACCAAAGTT    | 65.8    |
|              | Reverse primer | GACCCAATAGCATCACAACCA  | 65.6    |
| <i>EF1α</i>  | Forward primer | TCTTGGTAGACGCCTTACG    | 65.3    |
|              | Reverse primer | AGGAAGCGGTGCATTGTTG    | 65.0    |

**Table S2.** Statistical significance (P) of stress (S), treatment (T), and S x T interaction on chlorophyll a fluorescence parameters.

| Parameter                                                                                              | P               |               |                   |            |               |                   |
|--------------------------------------------------------------------------------------------------------|-----------------|---------------|-------------------|------------|---------------|-------------------|
|                                                                                                        | 3/07            |               |                   | 12/07      |               |                   |
|                                                                                                        | Stress (S)      | Treatment (T) | Interaction (SxT) | Stress (S) | Treatment (T) | Interaction (SxT) |
| Fluorescence emitted when all reaction centres (RCs) are open ( <b>F<sub>o</sub></b> )                 | 0.0815          | 0.6681        | 0.5853            | 0.1200     | 0.0469*       | 0.3461            |
| Maximum fluorescence emitted when all RCs are closed ( <b>F<sub>m</sub></b> )                          | 0.0103*         | 0.7780        | 0.9909            | 0.4354     | 0.3280        | 0.8177            |
| Maximum variable fluorescence ( <b>F<sub>v</sub></b> )                                                 | 0.0038*<br>*    | 0.7217        | 0.9566            | 0.6117     | 0.5347        | 0.9773            |
| Maximum quantum yield of primary photochemistry ( <b>F<sub>v</sub>/F<sub>m</sub></b> )                 | <0.0001<br>**** | 0.4204        | 0.5634            | 0.1501     | 0.0759        | 0.2939            |
| Time to reach F <sub>m</sub> ( <b>T<sub>fm</sub></b> )                                                 | <0.0001<br>**** | 0.4525        | 0.6630            | 0.3716     | 0.0605        | 0.7106            |
| Total complementary area between fluorescence induction curve and F = F <sub>m</sub> ( <b>Area</b> )   | 0.1230          | 0.5975        | 0.8904            | 0.3116     | 0.7531        | 0.2194            |
| Reaction centres per adsorption of light energy ( <b>RC/ABS</b> )                                      | 0.0416*         | 0.6857        | 0.8523            | 0.9561     | 0.7971        | 0.7526            |
| Conformation term for the primary photochemistry ( <b>F<sub>v</sub>/F<sub>o</sub></b> )                | <0.0001<br>**** | 0.4525        | 0.6630            | 0.1011     | 0.0568        | 0.2568            |
| Performance index ( <b>PI</b> )                                                                        | 0.0063*<br>*    | 0.8170        | 0.7383            | 0.6709     | 0.4007        | 0.6464            |
| Fluorescence of all open RCs/<br>Fluorescence of all closed RCs ( <b>F<sub>o</sub>/F<sub>m</sub></b> ) | <0.0001<br>**** | 0.4427        | 0.5902            | 0.1122     | 0.0480*       | 0.2402            |
| Normalized value of the initial slope of the fluorescence induction curve ( <b>M<sub>0</sub></b> )     | 0.0542          | 0.7883        | 0.7946            | 0.8483     | 0.5759        | 0.5789            |

|                                                                                                             |              |        |        |         |         |         |
|-------------------------------------------------------------------------------------------------------------|--------------|--------|--------|---------|---------|---------|
| Normalized Area by Fv (it gives a measure of the energy needed to close all reaction centres) ( <b>Sm</b> ) | 0.4936       | 0.3652 | 0.8777 | 0.0246* | 0.8623  | 0.0424* |
| Normalized Area per single turn-over ( <b>Ss</b> )                                                          | 0.0896       | 0.6130 | 0.9331 | 0.2496  | 0.7929  | 0.4881  |
| Absorption flux per RC (at t = 0) ( <b>ABS/RC</b> )                                                         | 0.0498*      | 0.7243 | 0.9407 | 0.1906  | 0.9980  | 0.5733  |
| Trapped energy flux per RC (at t = 0) ( <b>TR<sub>0</sub>/RC</b> )                                          | 0.0810       | 0.6533 | 0.9725 | 0.3077  | 0.7506  | 0.4611  |
| Electron transport flux per RC (at t = 0) ( <b>ET<sub>0</sub>/RC</b> )                                      | 0.3078       | 0.3879 | 0.5714 | 0.0651  | 0.9399  | 0.4250  |
| Dissipated energy flux per RC (at t = 0) ( <b>DI<sub>0</sub>/RC</b> )                                       | 0.0077*<br>* | 0.9898 | 0.8261 | 0.0319* | 0.1337  | 0.6145  |
| Absorption flux per cross section (CS), approximated by Fo ( <b>ABS/CS</b> )                                | 0.0815       | 0.6681 | 0.5853 | 0.1200  | 0.0469* | 0.3461  |
| RCs' concentration (or density) per excited CS ( <b>RC/CS</b> )                                             | 0.1534       | 0.6642 | 0.9820 | 0.3026  | 0.1104  | 0.4403  |
| Trapped energy flux per CS (at t = 0) ( <b>TR<sub>0</sub>/CS</b> )                                          | 0.2559       | 0.7745 | 0.8461 | 0.0382* | 0.0629  | 0.5031  |
| Electron transport flux per CS (at t = 0) ( <b>ET<sub>0</sub>/CS</b> )                                      | 0.1331       | 0.7874 | 0.7438 | 0.0239* | 0.0776  | 0.5842  |
| Dissipated energy flux per CS (at t = 0) ( <b>DI<sub>0</sub>/CS</b> )                                       | 0.0509       | 0.4095 | 0.8542 | 0.0517  | 0.0353* | 0.3240  |
| RCs' concentration per excited CS (Fo) ( <b>RC/CS<sub>0</sub></b> )                                         | 0.1534       | 0.6642 | 0.9820 | 0.3026  | 0.1104  | 0.4403  |
| RCs' concentration per excited CS (Fm) ( <b>RC/CS<sub>m</sub></b> )                                         | 0.0224*      | 0.8030 | 0.8911 | 0.6902  | 0.4458  | 0.7657  |

**Table S3.** Statistical significance (P) of stress (S), treatment (T), and S x T interaction on physiological parameters measured in lettuce plants during or at the end of the growing cycle.

| Parameter                        | P             |               |                   |                 |               |                   |
|----------------------------------|---------------|---------------|-------------------|-----------------|---------------|-------------------|
|                                  | 3/07          |               |                   | 12/07           |               |                   |
|                                  | Stress (S)    | Treatment (T) | Interaction (SxT) | Stress (S)      | Treatment (T) | Interaction (SxT) |
| Yield (g m <sup>-2</sup> )       | -             | -             | -                 | <0.0001<br>**** | 0.9835        | 0.3821            |
| Dry matter (%)                   | -             | -             | -                 | 0.0023**        | 0.3391        | 0.7315            |
| Water use efficiency (WUE)       | -             | -             | -                 | 0.0028**        | 0.9079        | 0.4195            |
| Chlorophyll (r.u.)               | 0.0590        | 0.2581        | 0.4806            | 0.6511          | 0.5514        | 0.9237            |
| Φ <sub>PSII</sub>                | -             | -             | -                 | 0.0475*         | 0.6783        | 0.6130            |
| ETR                              | -             | -             | -                 | 0.4304          | 0.1813        | 0.0415*           |
| Fs                               | -             | -             | -                 | 0.0004<br>***   | 0.5871        | 0.0619            |
| Nitrate [mg kg <sup>-1</sup> FW] | 0.0004<br>*** | 0.0716        | 0.2914            | -               | -             | -                 |

|                                                   |                 |        |        |   |   |   |
|---------------------------------------------------|-----------------|--------|--------|---|---|---|
| Proline ( $\mu\text{g g}^{-1}$ )                  | 0.0006<br>***   | 0.8973 | 0.9295 | - | - | - |
| Osmolytes ( $\text{mOsm kg}^{-1} \text{g}^{-1}$ ) | <0.0001<br>**** | 0.6970 | 0.9606 | - | - | - |

---

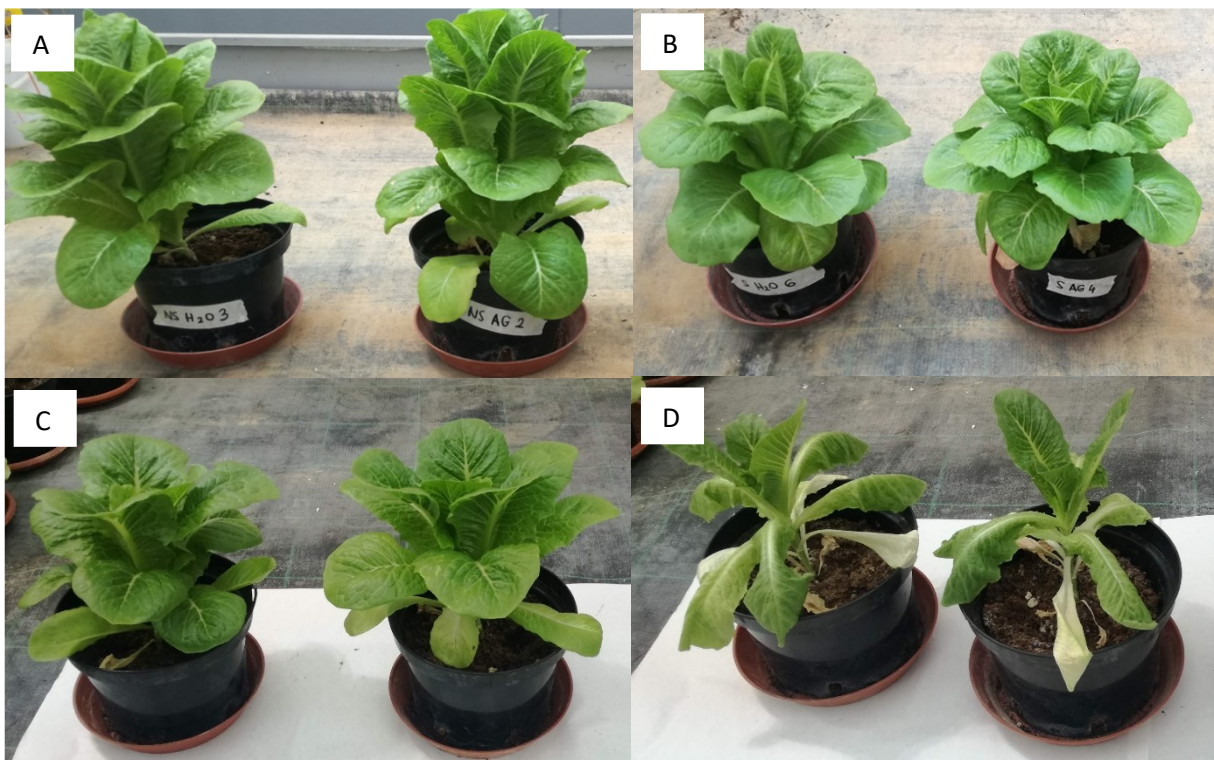

**Figure S1.** Lettuce plants during the water stress (3/07) (A: NO STRESS, B: STRESS) and at the end of the growing cycle after the re-watering (12/07) (C: NO STRESS, D: STRESS).
